# Supplementary material for: Results from the CLUES study: a cluster randomized trial for the evaluation of cardiovascular guideline implementation in primary care in Spain
Source: BMC Health Serv Res. 2018 Feb 8;18:93. doi: 10.1186/s12913-018-2863-x (PMC5806349; doi:10.1186/s12913-018-2863-x)
Supplement: Supplementary file 2 — Clues: Staff attendance at interventions in primary care units. Data containing a detailed description of staff attendance at interventions in primary care units in both groups (intervention and control). (DOCX 23 kb) [file 12913_2018_2863_MOESM2_ESM.docx]

**Clues: Staff attendance at interventions in primary care units**

Medical and nursing staff attendance at interventions in primary care units: intervention group

| Primary Care Units | Clinical meetings | | Coronary risk workshops | | Diabetic foot workshops | Number of visits to the website |
| --- | --- | --- | --- | --- | --- | --- |
| Medical staff (%) | Nursing staff (%) | Medical staff (%) | Nursing staff (%) | Nursing staff  (%) | Number of visits per physician |
| Amara Berri | 71.4 | 50.0 | 50.0 | 53.3 | 73.3 | 121 |
| Amara Centro | 90.0 | 40.0 | 40.0 | 70.0 | 80.0 | 76 |
| Egia | 62.5 | 62.5 | 62.5 | 55.6 | 77.8 | 87 |
| Hernani-Urnieta-Astigarraga | 68.7 | 62.5 | 62.5 | 75.0 | 87.5 | 237 |
| Hondarribi | 75.0 | 75.0 | 75.0 | 100.0 | 71.4 | 127 |
| Intxaurrondo | 71.4 | 57.1 | 57.1 | 100.0 | 57.1 | 151 |
| Iztieta | 84.6 | 53.8 | 53.8 | 66.7 | 53.3 | 205 |
| Loiola | 100.0 | 50.0 | 50.0 | 50.0 | 75.0 | 239 |
| Ondarreta | 57.1 | 14.3 | 14.3 | 56.2 | 56.2 | 76 |
| Pasai San Pedro | 66.7 | 66.7 | 66.7 | 66.7 | 83.3 | 529 |
| Zarautz-Orio- Aia | 81.2 | 68.7 | 68.7 | 62.5 | 62.5 | 209 |
| Bombero Etxaniz | 47.4 | 68.4 | 68.4 | 90.0 | 40.0 | 22 |
| Basurto-Altamira | 84.6 | 100.0 | 100.0 | 100.0 | 23.1 | 38 |
| Casco Viejo | 71.4 | 100.0 | 100.0 | 100.0 | 14.3 | 95 |
| Gazteleku | 57.1 | 85.7 | 85.7 | 100.0 | 53.3 | 110 |
| Indautxu | 83.3 | 83.3 | 83.3 | 100.0 | 21.4 | 6 |
| La Merced | 100.0 | 100.0 | 100.0 | 100.0 | 50.0 | 81 |
| Rekalde | 52.9 | 94.1 | 94.1 | 100.0 | 20.0 | 100 |
| San Adrian | 88.9 | 100.0 | 100.0 | 100.0 | 42.9 | 48 |
| San Ignacio | 46.7 | 80.0 | 80.0 | 0.0 | 46.7 | 21 |
| Zorroza-Alonsotegui | 70.0 | 90.0 | 90.0 | 50.0 | 70.0 | 0 (*) |
| **Total** | **69.6%** | **71.3%** | **71.3%** | **75.0%** | **52.8%** | **109** |

(*) For technical reasons, it was not possible to activate the Website in Zorroza-Alonsotegui.

Medical and nursing staff attendance at interventions in primary care units: control group

| Primary Care Units | **Clinical meetings** | |
| --- | --- | --- |
| **% Physician staff** | **% Nursing staff** |
| Parte Vieja | 42.9 | 25.0 |
| Alza | 50.0 | 66.7 |
| Beraun | 80.0 | 72.7 |
| Bidebieta | 60.0 | 100.0 |
| Dunboa | 75.0 | 86.7 |
| Gros | 100.0 | 88.2 |
| Irun | 27.8 | 36.8 |
| Lasarte-Usurbil | 69.2 | 53.8 |
| Lezo-Pasajes San Juan | 66.7 | 100.0 |
| Oiartzun | 66.7 | 60.0 |
| Pasajes Antxo | 75.0 | 75.0 |
| Zumaia-Zestoa-Getaria | 77.8 | 37.5 |
| Begoña | 100.0 | 80.0 |
| Bolueta | 62.5 | 37.5 |
| La Peña | 100.0 | 71.4 |
| Deusto | 56.3 | 66.7 |
| Karmelo | 66.7 | 60.0 |
| Javier Saenz de Buruaga | 37.5 | 75.0 |
| Otxarkoaga | 100.0 | 45.5 |
| Santutxu-Solokoetxe | 66.7 | 42.9 |
| Txurdinaga | 44.4 | 70.0 |
| Zurbaran | 75.0 | 71.4 |
| **Total** | **66.7%** | **62.7%** |
